# Supplementary material
Source: Springer Nature journal article supplement (https://www.springermedizin.de/resource/supplementary/12893_2010_179_MOESM2_ESM.pdf/9511732)

(a) Year One

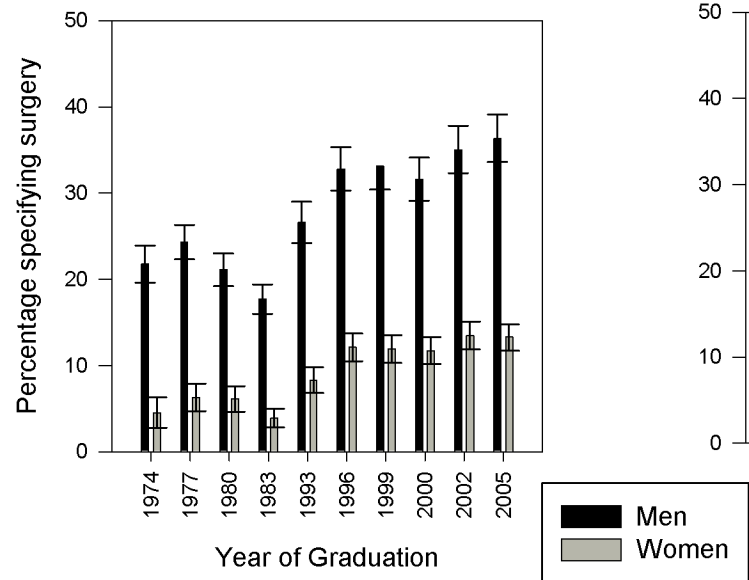

(b) Year Three

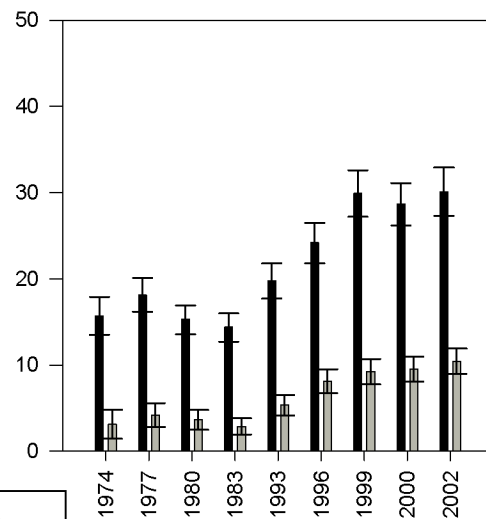

(c) Year Five

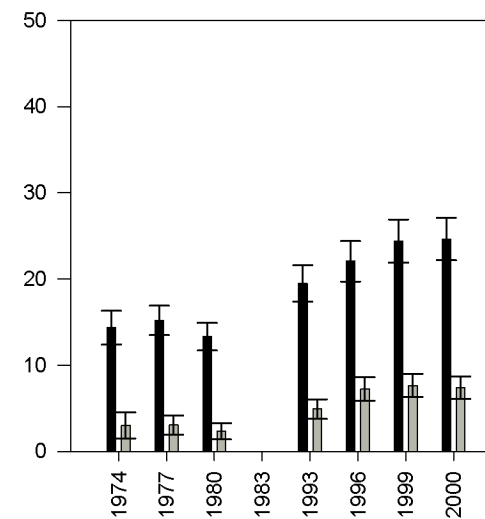

(d) Year One excluding GP

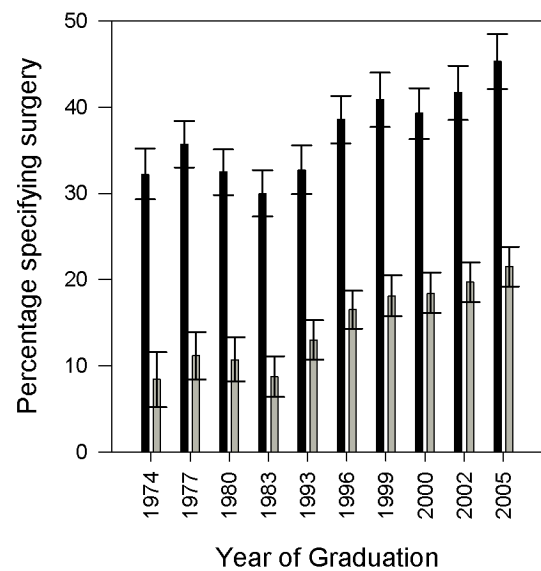

(e) Year Three excluding GP

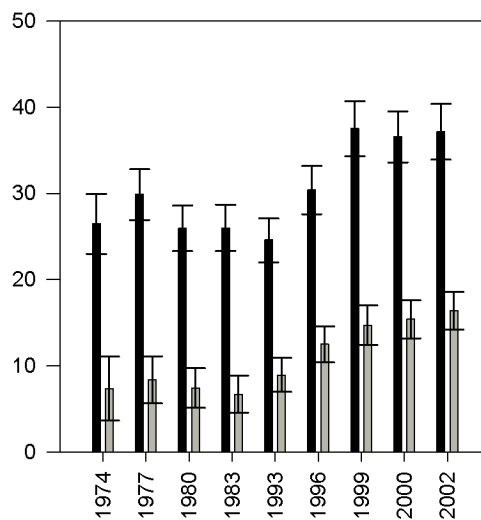

(f) Year Five excluding GP

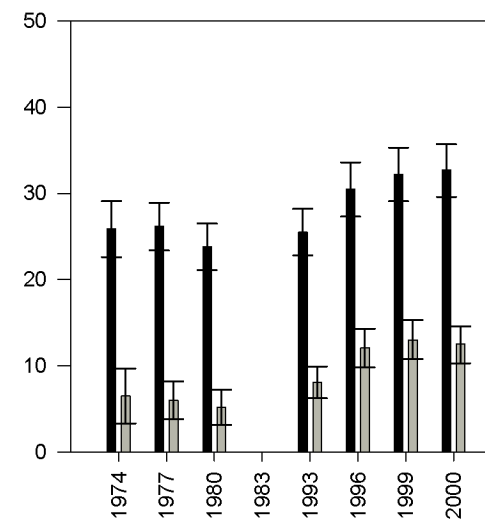

Supplement: MOESM2 [file 9511732]
